# Supplementary material for: Activity-dependent death of transient Cajal-Retzius neurons is required for functional cortical wiring
Source: eLife. 2019 Dec 31;8:e50503. doi: 10.7554/eLife.50503 (PMC6938399; doi:10.7554/eLife.50503)
Supplement: Figure 1—figure supplement 1—source data 1. [file elife-50503-fig1-figsupp1-data1.xlsx]

## Sheet: Fig 1
	CR CELLS DENSITY QUANTIFICATION
	COUNT CELLS / MM3
			Np73cre					Wnt3acre
			Nb CR cells (x10^3)/mm3				Nb CR cells (x10^3)/mm3
		P7					P7
				Nb CR cells					Nb CR cells
		Np73tom	ctr1	27			Wnt3atom	ctr1	20
			ctr2	26				ctr2	19
			ctr3	34				ctr3	18
			tom4	23				ctr4	17
			tom5	27				ctr5	26
			tom6	25			Wnt3aKir	mut1	16
		Np73Kir	mut1	22				mut2	13
		silence 80% CR	mut2	35				mut3	19
			mut3	34				mut4	18
			mut4	26				mut5	15
								mut6	22
			mean Np73tom	27				mean Wnt3atom	20
			mean Np73Kir	29.25				mean Wnt3aKir	17.1667
		P15					P15
				Nb CR cells					Nb CR cells
		Np73tom	ctr F1	7.11997			Wnt3atom	ctr1	3.55999
			ctr F2	1.77999				ctr2	2.66999
			ctr M1	3.55999				ctr3	6.22998
			ctr M2	4.44998				ctr4	4.44998
		Np73Kir	mut1	14.2399			Wnt3aKir	mut1	3.55999
			mut2	9.78996				mut2	4.44998
			mut3	9.78996				mut3	2.66999
			mut4	10.68
		pg300517	mut1	11.57				mean Wnt3atom	4.22748
			mut2	14.2399				mean Wnt3aKir	3.55999
			mut3	9.78996
			mut4	11.57
			mut5	9.78996
			mut6	11.57
			mean Np73tom	4.22748
			mean Np73Kir	11.303
		P25					P25		Nb CR cells
				Nb CR cells
		Np73tom	ctr 1	0			Wnt3atom	ctr1	0
			ctr 2	0				ctr2	0
			ctr 3	1.59473				ctr3	1.59473
		Np73Kir	mut1	3.98683			Wnt3aKir	mut1	1.59473
			mut2	7.97366				mut2	0.797366
			mut3	3.98683				mut3	0
			mut4	4.78419
			new5	5.58156				mean Wnt3atom	0.531577
			new3	7.97366				mean Wnt3aKir	0.797366
			new 8	6.37892
			new1	6.37892
			mean Np73tom	0.531577
			mean Np73Kir	5.80938

## Sheet: Fig 1 Supp 1
	Vm CR CELLS (mV)					Rin CR CELLS (gigaOhms)					1st spike amplitude CR CELLS (mV)					2nd spike amplitude CR CELLS (mV)					1st spike duration CR CELLS (mV)					2nd spike duration CR CELLS (mV)					AHP CR CELLS (mV)
		Np73Tom P13-17 (CTRL)	Np73Kir P13-17 (Mutant)	Np73Kir P25-29 (Mutant)			Np73Tom P13-17 (CTRL)	Np73Kir P13-17 (Mutant)	Np73Kir P25-29 (Mutant)			Np73Tom P13-17 (CTRL)	Np73Kir P13-17 (Mutant)	Np73Kir P25-29 (Mutant)			Np73Tom P13-17 (CTRL)	Np73Kir P13-17 (Mutant)	Np73Kir P25-29 (Mutant)			Np73Tom P13-17 (CTRL)	Np73Kir P13-17 (Mutant)	Np73Kir P25-29 (Mutant)			Np73Tom P13-17 (CTRL)	Np73Kir P13-17 (Mutant)	Np73Kir P25-29 (Mutant)			Np73Tom P13-17 (CTRL)	Np73Kir P13-17 (Mutant)	Np73Kir P25-29 (Mutant)
		-43	-78.2	-68.4			0.8745	0.3515	0.462			56.64	44.78	42.27			39.66	36.58	34.63			3.26	3.21	2.07			3.26	3.21	2.07			-13.09	-7.71	-20.23
		-38	-81.2	-20.5			1.2375	0.529	0.8805			48.28	40.26	47.28			30.52	29.49	41.11			4.28	3.25	1.88			4.28	3.25	1.88			-5.27	-5	-23.4
		-43	-83.5	-38.5			2.871	0.37	0.806667			33.96	47.64	43.14			28.48	40.13	39.18			2.46	2.36	2.68			2.46	2.36	2.68			-15.3	-13.7	-14.08
		-34.9	-84.6	-87.2			1.866	0.368	0.6485			52.42	52.29	34.01			39.36	28.49	46.76			2.34	3.18	4.12			2.34	3.18	4.12			-13.38	-0.75	-16.16
		-39.4	-81.2	-88.4			1.291	0.26	0.4695			57.64	59.95	62.92			43.68	55.94	32.6			2.99	1.65	3.84			2.99	1.65	3.84			-13.04	-15.91	-11.11
		-32.4	-80.6	-88.7			1.7145	0.255	0.6545			68.76	41.86	45.21			52.2	35.1	35.42			2.39	2.29	3.12			2.39	2.29	3.12			-16.02	-16.37	-7.01
		-51	-81	-87.7			1.7835	0.376	0.801			26.72	52.44	36.78			24.69	44.31				3.54	3.26	2.66			3.54	3.26	2.66			-4.99	-10.18	-24.04
		-42.5	-78	-28.5			1.2015	0.212857				44.67	26.46				38.08	33.08				1.99	2.13				1.99	2.13				-19.9	-16.75
		-43.5	-80	-89.6			3.0495	0.55				63.21	49.1				57.01	43.52				2.04	2.28				2.04	2.28				-16.08	-19.35
		-39.8	-78	-90.1			2.602	0.396667				53.76	45.84				41.8	41.78				2.78	3.17				2.78	3.17				-11.94	-18.37
		-41.5	-88.2	-85.1			1.826	0.2575				51.06	46.06				30.02	44.43				2.84	2.82				2.84	2.82				-11.53	-17.91
		-38.3	-80.6				0.7555	0.3445				64.81	54.13				41.41	50.45				3.65	1.4				3.65	1.4				-5.1	-27.26
		-44.5	-86.8					0.3945					40.92					38.47					1.9					1.9					-20.23
		-36.4	-84.8					0.4325					64.63					57.35					2.91					2.91					-12.55
		-38.8	-85.7					0.568					41.17					39.99					2.26					2.26					-15.65
		-47.4	-86.7
			-86.4
	mean	-40.9	-82.6765	-70.2455		mean	1.756	0.3777	0.6747			51.83	47.17	44.52			38.91	41.27	38.28			2.88	2.538	2.91			4.06	3.145	3.38			-12.14	-14.51	-16.58
	MORPHOLOGY CR CELLS
			Soma diameter (um)	filament length total (um)	flament length total (x10^3 um)
	CONTROL		15.5	638.925	0.638925
			10.3	197.405	0.197405
			14	288.325	0.288325
			9.85	881.024	0.881024
			12.3	351.97	0.35197
			14.7	424.473	0.424473
			15.8	1259.49	1.25949
			15.6	913.372	0.913372
		mean control	13.5062	619.373	0.619373
			Soma diameter (um)	filament length total (um)	flament length total (x10^3 um)
	Np73Kir		12.5	503.093	0.503093
			9.87	998.861	0.998861
			12.1	944.135	0.944135
			9.9	1251.36	1.25136
			14.8	212.368	0.212368
			10.3	748.331	0.748331
			11.3	664.597	0.664597
			9.52	429.006	0.429006
		mean Np73Kir P15-P17	11.2862	718.969	0.718969
			Soma diameter (um)	filament length total (um)	flament length total (x10^3 um)
	Np73Kir		9.95	824.8	0.8248
			8.23	295.464	0.295464
			7.83	374.592	0.374592
			12.8	371.44	0.37144
			11.6	774.92	0.77492
			10.06	1255.7	1.2557
			10.2
			9.85	242.902	0.242902
			10.3	1190.39	1.19039
		mean Np73Kir P26-P29	10.0911	666.277	0.666277
