# Supplementary material for: Activity-dependent death of transient Cajal-Retzius neurons is required for functional cortical wiring
Source: eLife. 2019 Dec 31;8:e50503. doi: 10.7554/eLife.50503 (PMC6938399; doi:10.7554/eLife.50503)
Supplement: Figure 2—figure supplement 1—source data 1. [file elife-50503-fig2-figsupp1-data1.xlsx]

## Sheet: Fig 2
	SPONTANEOUS PSCs OF CRs						EVOKED PSCs OF CRs (pA)
	Frequency (Hz)			Amplitude (pA)			Control			SR95531			SR95531, 0 Mg2+
	Np73Kir	Np73BAX		Np73Kir	Np73BAX		Np73Kir	Np73BAX		Np73Kir	Np73BAX		Np73Kir	Np73BAX
	0.0326087	0.055		35.294	30.626		21.5446	23.0553		0.969556	0.857337		1.21652	0.343923
	0.0271739	0.022		82.373	102.721		36.9208	38.3579		-0.293347	1.04784		0.178079	-0.230849
	0.0108696	0.038		83.8534	84.4136		25.1942	35.8157		-0.26063	-0.00720091		-1.185	0.164206
	0.0706522	0.033		10.8189	37.036		11.528	37.8682		-1.48377	2.40063		-1.90872	0.168476
	0.0543478	0.044		30.6305	25.796		10.1481	11.3324		-3.24651	0.777563		-5.78682	-0.464666
	0.00543478	0.011		27.4496	34.5808		49.7382	29.3249		0.197745	0.435511		-1.34651
	0.0271739	0.016		28.0691	19.99		64.9198	44.3993		0.018703	0.782807		-0.321579
	0.048913	0		25.2067	59.6281		33.9053	30.5025		-0.159763	1.09626		-0.289531
	0.048913	0		33.0275			12.5511
	0.005435	0		63.3155			11.6641
	0	0.05
	Np73Kir	Np73BAX		Np73Kir	Np73BAX		Np73Kir	Np73BAX		Np73Kir	Np73BAX		Np73Kir	Np73BAX
mean	0.0301384	0.0244545		42.0038	49.3489		27.8114	31.332		-0.532252	0.923843		-1.18045	-0.003782

## Sheet: Fig 2 Supp 1
Np73cre/+ R26mT/+	P9-11
	Frequency sPSC (Hz)		Amplitude sPSC (pA)
	0.00543478		27.7746
	0.652174		151.08
	0.48913		43.8391
	0.141304		139.37
	0.0869565		33.2362
	1.09211		53.2183
	0.478261
	0.0163043
mean	0.370209		74.753
Np73cre/+ R26mT/+	P9-11
	Control	SR95531	SR95531, 0 Mg2+
	42.9098	0.641942	0.010993
	108.658	-1.15621	0.0140491
	179.02	-0.534458	-1.06156
	49.1081	0.892943	1.42354
	189.768	0.71215	-0.702466
	150.172	0.915518	1.08526
	36.3472	0.895439	0.5872
	32.4674
mean	98.5562	0.338189	0.193859
