# Supplementary material for: Activity-dependent death of transient Cajal-Retzius neurons is required for functional cortical wiring
Source: eLife. 2019 Dec 31;8:e50503. doi: 10.7554/eLife.50503 (PMC6938399; doi:10.7554/eLife.50503)
Supplement: Figure 3—figure supplement 1—source data 1. [file elife-50503-fig3-figsupp1-data1.xlsx]

## Sheet: Fig 3
	PYRAMIDAL NEURON MORPHOLOGY
		Number of dendrite branch
			APICAL	BASAL					APICAL	BASAL
	CONTROL Bax		25	12			Normalization		83.3333	51.2195
			28	21			(% of control)		93.3333	89.6341
			48	26					160	110.976
			22	10					73.3333	42.6829
			40	32					133.333	136.585
			24	22					80	93.9024
			23	41					76.6667	175
			30	23.4286					100	100
	NP73 BAX		44	43					146.667	183.537
			36	28					120	119.512
			51	23					170	98.1707
			42	50					140	213.415
			41	34					136.667	145.122
			42	40					140	170.732
			46	47					153.333	200.61
			46	46					153.333	196.341
			43.5	38.875					145	165.93
	Sholl analysis
	Control														Mutant
	Apical	Radius	Ctrl1P1	Ctrl1P4	Ctrl2P1	Ctrl2P4	Ctrl3P1	Ctrl2P3	Ctrl3P3	Mean	SEM					Apical		Mut1P1	Mut2P3	Mut2P4	Mut4P1	Mut4P2	Mut2P1	Mut3P1	Mut3P4	Mean	SEM
		0	0	0	0	0	0	0	0	0	0
		20	2	4	2	2	3	9	1	3.28571	1.83673						0	0	0	0	0	0	0	0	0	0	0
		40	5	11	5	5	8	19	3	8	4						20	1	4	4	6	3	7	7	2	4.25	1.8125
		60	7	8	14	6	10	20	4	9.85714	4.12245						40	11	4	9	11	9	16	13	4	9.625	3.125
		80	9	11	16	7	10	17	5	10.7143	3.38776						60	12	7	13	10	7	24	18	8	12.375	4.46875
		100	11	8	20	8	3	12	4	9.42857	4.20408						80	13	9	11	14	10	17	15	11	12.5	2.25
		120	14	5	14	9	3	6	8	8.42857	3.34694						100	8	7	9	11	9	12	13	11	10	1.75
		140	16	2	12	8	3	7	4	7.42857	3.91837						120	3	6	8	11	10	12	12	18	10	3.25
		160	15	4	15	5	3	5	5	7.42857	4.32653						140	2	9	7	15	13	12	12	17	10.875	3.65625
		180	11	5	9	6	2	4	3	5.71429	2.53061						160	1	13	15	11	9	14	14	20	12.125	3.84375
		200	10	3	9	8	3	3	5	5.85714	2.69388						180	3	13	9	10	9	14	7	17	10.25	3.3125
		220	6	2	5	8	4	1	4	4.28571	1.7551						200	4	10	10	15	9	13	7	15	10.375	2.96875
		240	4	1	8	8	3	0	4	4	2.28571						220	12	10	11	12	9	11	4	11	10	1.75
		260	1	0	2	9	5	0	5	3.14286	2.73469						240	13	10	11	6	10	7	5	11	9.125	2.34375
		280	1	0	1	8	6	0	4	2.85714	2.69388						260	14	7	7	7	6	2	3	10	7	2.5
		300	0	0	1	6	4	0	0	1.57143	1.95918						280	14	5	6	6	6	0	3	4	5.5	2.5
		320	0	0	0	6	1	0	0	1	1.42857						300	14	2	6	4	2	0	1	1	3.75	3.1875
		340	0	0	0	3	1	0	0	0.571429	0.816327						320	11	0	2	2	2	0	1	0	2.25	2.1875
		360	0	0	0	2	0	0	0	0.285714	0.489796						340	6	0	0	0	1	0	1	0	1	1.25
																	360	0	0	0	0	1	0	0	0	0.125	0.21875
																	380	0	0	0	0	0	0	0	0	0	0
	Basal	0	0	0	0	0	0	0	0	0	0					Basal	0	0	0	0	0	0	0	0	0	0	0
		20	4	11	11	10	12	6	10	9.14286	2.36735						20	13	12	15	14	10	7	14	11	12	2
		40	7	15	20	22	16	10	14	14.8571	3.87755						40	22	18	18	18	17	15	23	25	19.5	2.875
		60	11	14	20	22	17	8	18	15.7143	4.04082						60	28	18	24	21	18	17	20	26	21.5	3.375
		80	8	12	16	14	12	3	18	11.8571	3.63265						80	25	19	20	21	20	9	14	23	18.875	3.6875
		100	8	7	10	8	7	2	17	8.42857	2.89796						100	21	16	11	21	17	1	7	23	14.625	6.21875
		120	4	1	4	3	0	0	11	3.28571	2.61224						120	13	10	7	14	10	0	0	11	8.125	4.34375
		140	2	1	1	0	0	0	5	1.28571	1.26531						140	7	7	1	6	4	0	0	4	3.625	2.46875
		160	0	1	1	0	0	0	2	0.571429	0.653061						160	0	4	0	4	1	0	0	0	1.125	1.4375
		180	0	1	1	0	0	0	0	0.285714	0.408163						180	0	1	0	2	0	0	0	0	0.375	0.5625
		200	0	0	1	0	0	0	0	0.142857	0.244898						200	0	1	0	1	0	0	0	0	0.25	0.375
																	220	0	0	0	0	0	0	0	0	0	0

## Sheet: Fig 3 Supp 1
	PYRAMIDAL NEURON MORPHOLOGY
		Number of dendrite branch
		APICAL	BASAL				APICAL	BASAL
	CONTROL Kir	24	32			Normalization	84.4221	74.9164
		24	40			(% of control)	84.4221	93.6455
		32	59				112.563	138.127
		25	45				87.9397	105.351
		23	54				80.9045	126.421
		38	46				133.668	107.692
		33	23				116.08	53.8462
	mean control	28.4286	42.7143			mean control	100	100
	Np73Kir	36					126.633
		25	45				87.9397	105.351
		27	41				94.9749	95.9866
			39					91.3043
		16	28				56.2814	65.5518
		34	35				119.598	81.9398
		26					91.4573
		30	27				105.528	63.2107
		27	44				94.9749	103.01
		36	25				126.633	58.5284
	mean Np73Kir	28.5556	35.5			mean Np73Kir	100.447	83.1104
	Sholl analysis
	Control Kir (number of intersections)													Np73Kir (number of intersections)
	Apical	Radius	703 Ctr1C2	703 Ctr1C3	703 Ctr2C1	1003 Ctr1C2	1003 Ctr1C4	1902 Ctr1C4	2002 Ctr1C3	Mean	SEM			Apical	Radius	1203Mut1C2	1203 Mut1C3	1602 Mut1C1	1602 Mut1C2	2002 Mut1C2	2002 Mut1C4	2102 Mut1C1	2102 Mut1C2	2102 Mut1C4	Mean	SEM
		0	0	0	0	0	0	0	0	0	0				0	0	0	0	0	0	0	0	0	0	0	0
		20	2	3	2	1	1	2	5	2.28571	0.979592				20	2	3	3	2	3	1	6	1	1	2.44444	1.34694
		40	3	12	4	1	2	8	12	6	4				40	3	6	1	3	6	5	14	3	6	5.22222	2.77551
		60	4	10	5	10	9	11	12	8.71429	2.40816				60	5	10	8	4	12	8	13	6	6	8	2.4898
		80	4	9	5	9	8	13	17	9.28571	3.26531				80	8	4	9	7	8	11	15	6	8	8.44444	2.20408
		100	5	6	7	9	12	14	12	9.28571	2.89796				100	8	2	7	4	4	9	14	4	6	6.44444	2.69388
		120	4	4	8	7	9	13	6	7.28571	2.32653				120	5	1	4	8	4	5	15	4	4	5.55556	2.97959
		140	4	2	10	5	7	9	4	5.85714	2.40816				140	8	2	2	7	3	5	9	5	4	5	1.71429
		160	3	3	10	3	5	7	1	4.57143	2.36735				160	11	3	2	9	4	5	8	7	7	6.22222	2
		180	5	3	9	3	8	7	1	5.14286	2.44898				180	10	3	2	18	7	1	6	6	6	6.55556	3.38776
		200	8	5	10	4	8	6	1	6	2.28571				200	11	4	2	13	11	1	7	9	5	7	3.59184
		220	8	7	11	4	4	6	2	6	2.28571				220	11	4	2	8	12	1	4	10	6	6.44444	3.30612
		240	8	9	7	6	2	4	3	5.57143	2.20408				240	11	7	2	4	9	1	3	9	6	5.77778	2.69388
		260	9	10	3	9	1	2	3	5.28571	3.46939				260	4	6	2	4	3	1	3	8	6	4.11111	1.83673
		280	8	8	1	7	1	1	4	4.28571	2.89796				280	1	6	2	1	0	1	0	4	6	2.33333	1.71429
		300	3	8	0	2	0	1	3	2.42857	1.91837				300	0	3	6	1	0	1	0	1	6	2	2.20408
		320	0	4	0	1	0	0	3	1.14286	1.34694				320	0	1	6	0	0	1	0	1	9	2	2.89796
		340	0	1	0	0	0	0	2	0.428571	0.612245				340	0	0	7	0	0	1	0	1	6	1.66667	2.4898
		360	0	0	0	0	0	0	0	0	0				360	0	0	8	0	0	1	0	0	3	1.33333	2.16327
		380	0	0	0	0	0	0	0	0	0				380	0	0	6	0	0	1	0	0	2	1	1.55102
		400	0	0	0	0	0	0	0	0	0				400	0	0	1	0	0	2	0	0	4	0.777778	1.14286
	Basal	Radius	703 Ctr1C2	703 Ctr1C3	703 Ctr2C1	1003 Ctr1C2	1003 Ctr1C4	1902 Ctr1C4	2002 Ctr1C3	Mean	SEM			Basal	Radius	1203Mut1C2	1203 Mut1C3	1602 Mut1C2	2002 Mut1C2	2002 Mut1C3	2002 Mut1C4	2102 Mut1C1	2102 Mut1C4	Mean	SEM
		0	0	0	0	0	0	0	0	0	0				0	0	0	0	0	0	0	0	0	0	0
		20	11	8	14	11	11	15	6	10.8571	2.20408				20	11	11	10	10	14	7	8	7	10.8889	2.76543
		40	21	24	26	32	17	26	12	22.5714	5.06122				40	27	14	20	17	19	11	22	15	20.5556	6.07407
		60	22	24	36	33	21	23	13	24.5714	5.67347				60	28	16	25	21	24	22	24	15	26.1111	7.95062
		80	20	25	37	30	15	20	14	23	6.57143				80	16	12	24	26	22	18	22	14	26	12
		100	18	20	23	25	11	19	6	17.4286	5.10204				100	11	7	18	23	23	15	14	11	24.6667	16.7407
		120	10	9	12	12	7	4	1	7.85714	3.30612				120	1	4	4	13	10	9	7	8	19.5556	22.321
		140	4	4	3	8	4	1	0	3.42857	1.79592				140	0	0	3	4	3	2	4	4	17.7778	27.1605
		160	3	0	1	0	0	0	0	0.571429	0.816327				160	0	0	2	2	0	0	1	1	18.4444	31.4568
		180	5	0	0	0	0	0	0	0.714286	1.22449				180	0	0	1	0	0	0	0	0	20.1111	35.5309
		200	8	0	0	0	0	0	0	1.14286	1.95918				200	0	0	0	0	0	0	0	0	22.2222	39.5062
		220	8	0	0	0	0	0	0	1.14286	1.95918				220	0	0	0	0	0	0	0	0	24.4444	43.4568
		240	8	0	0	0	0	0	0	1.14286	1.95918				240	0	0	0	0	0	0	0	0	26.6667	47.4074
		260	9	0	0	0	0	0	0	1.28571	2.20408				260	0	0	0	0	0	0	0	0	28.8889	0
