# Supplementary material for: Activity-dependent death of transient Cajal-Retzius neurons is required for functional cortical wiring
Source: eLife. 2019 Dec 31;8:e50503. doi: 10.7554/eLife.50503 (PMC6938399; doi:10.7554/eLife.50503)
Supplement: Figure 4—figure supplement 1—source data 1. [file elife-50503-fig4-figsupp1-data1.xlsx]

## Sheet: Fig 4
	SPINES QUANTIFICATION OF PYRAMIDAL CELLS									EXCITATION/INHIBITION RATIO OF PYRAMIDAL CELLS
		APICAL		BASAL				E/I
								control BAX	Np73BAX		control Kir	Np73Kir
		Number of spines/um		Number of spines/um				0.316482	0.144909		0.101107	0.144157
	CONTROL Kir							0.227878	0.231332		0.173822	0.178985
		0.863316		1.17029				0.151191	0.362812		0.224577	0.095609
		0.808169		1.06072				0.254373	0.28449		0.367255	0.198753
		0.876702		1.26923				0.315403	0.498567		0.118235	0.132955
		0.918926		1.01337				0.395252	0.267754		0.162838	0.0952215
		1.02527		1.19817				0.149323	0.275706		0.155815	0.154591
		1.07829		1.07597				0.169366	0.230835		0.0647134
		1.08055		0.92721				0.186708	0.541171
		1.32737		1.00313				0.0717936	0.247713
		0.874836		0.819544					0.258484
		0.891445							0.476829
									0.445959
	Np73Kir	0.950267		1.19785					0.340185
		0.998653		1.01486
		1.11087		0.976234
		1.03004		1.00003
		1.28258		1.09365
		1.1242		0.811339				control BAX	Np73BAX		control Kir	Np73Kir
				1.109			mean	0.223777	0.329053		0.171045	0.142896
	mean control	0.974487		1.05974
	mean Np73Kir	1.08277		1.01566
		APICAL		BASAL
		Number of spines/um		Number of spines/um
	CONTROL Bax
		0.713885		0.95657
		0.828779		0.825104
		0.825058		0.841821
		1.05909		1.01333
		0.878		0.884737
		1.00655		0.887013
		1.05741		1.3314
		1.05011		1.00752
	Np73Bax	0.738355		0.841545
		1.16136		1.26296
		1.05669		1.30841
		0.93394		1.19564
		1.02272		1.20078
		1.3822		1.41519
		1.37717		1.11764
		1.14849		1.40954
		1.65629		1.51463
		1.33705		1.60334
		1.18092		1.65833
		1.71067		1.27527
	mean control	0.92736		0.968438
	mean Np73Bax	1.22549		1.31694

## Sheet: Fig 4 Supp 1
	eEPSCs OF PYRAMIDAL CELLS (pA)							eIPSCs OF PYRAMIDAL CELLS (pA)							SPONTANEOUS EPSCs OF PYRAMIDAL CELLS
	Amplitude (pA)			Amplitude (pA)				Amplitude (pA)			Amplitude (pA)				Frequency (Hz)
	control BAX	Np73BAX		control Kir	Np73Kir			control BAX	Np73BAX		control Kir	Np73Kir			control BAX	Np73BAX		control Kir	Np73Kir
	553.59	133.45		177.875	123.916			1749.2	920.92		1759.28	859.59			0.822222	0.855556		0.555556	0.577778
	216.58	194.61		180.457	87.6901			950.42	841.26		1038.17	489.931			0.777778	1.35556		1.61111	0.522222
	51.213	478.15		135.283	84.5269			338.73	1317.9		602.39	884.089			1.02222	1.08889		0.488889	0.555556
	714.1	695.18		134.005	192.76			2807.3	2443.6		364.883	969.848			1.21111	0.933333		1.1	0.588889
	51.111	786.14		111.464	153.135			162.05	1576.8		942.732	1151.78			0.555556	2.06667		1.34444	0.588889
	291.04	559.98		217.839	116.712			736.34	2091.4		1337.76	1225.69			0.811111	0.9		0.6	1.35556
	94.477	418.77		76.9418	195.554			632.7	1518.9		493.802	1264.98			0.711111	2.15556		1.47778	1.07778
	370.81	307.68		81.59				2189.4	1332.9		1260.79				1.18889	1.16667			0.933333
	315.2	536.62						1688.2	991.59						1.54444	1.63333
	181.81	307.56						2532.4	1241.6							1.55556
		375.06							1451							1.2
		535.86							1123.8
		605.3							1357.3
		512.59							1506.8
mean	283.993	460.496		139.432	136.328			1378.67	1408.27		974.976	977.987			0.960494	1.35556		1.0254	0.775
	success of photostimulation
	%
	2Hz	5Hz	10Hz	20Hz
	100	100	44	0.5
	100	100	30	0.5
	100	100	100	17.5
	100	100	99	1
	100	100	100	26
	100	94	33	1
	100	100	100	6
	100	100
mean	100	99.25	72.29	7.5
